# Supplementary material for: Nanotubular Fe2O3 and Mn3O4 with hierarchical porosity as high-performance anode materials for lithium-ion batteries
Source: Royal Society of Chemistry journal article supplement (doi:10.1039/d3dt03354f), 2023-01-01
Supplement: d3dt03354f1.pdf [file d3dt03354f1.pdf]

## Supporting Information

### Nanotubular Fe<sub>2</sub>O<sub>3</sub> and Mn<sub>3</sub>O<sub>4</sub> with hierarchical porosity as high-performance anode materials for lithium-ion batteries

Zhen Li<sup>a\*</sup>, Man Yang<sup>a,b</sup>, Fengting Geng<sup>a,c</sup>, Dashuai Zhang<sup>a</sup>, Yongzheng Zhang<sup>a</sup>,  
Xiuling Zhang<sup>a</sup>, Xuliang Pang<sup>a\*</sup>, Longlong Geng<sup>a,b,c\*</sup>

<sup>a</sup>Shandong Provincial Key Laboratory of Monocrystalline Silicon Semiconductor Materials and Technology, College of Chemistry and Chemical Engineering, Dezhou University, Dezhou 253023, P. R. China

<sup>b</sup>School of Chemical Engineering and Technology, North University of China, Taiyuan 030051, PR China

<sup>c</sup>School of Chemistry and Chemical Engineering, Shandong University of Technology, Zibo 255000, PR China

\*Email: [lizhendiyi@163.com](mailto:lizhendiyi@163.com) (Zhen Li); [pangxuliang163@163.com](mailto:pangxuliang163@163.com) (Xuliang Pang);  
[llgeng@126.com](mailto:llgeng@126.com) (Longlong Geng)

#### Materials Characterization

Powdery X-ray diffraction (XRD) analysis was conducted on a BRUKER D2 PHASER X-Ray Diffractometer with Cu K $\alpha$  radiation. The microstructure and morphology of the materials were characterized by a field-emission scanning electron microscopy (FE-SEM, Hitachi S4800) and transmission electron microscopy (Hitachi H-800 TEM at 200 kV). The chemical state of the materials was analyzed by X-ray photoelectron spectroscopy (XPS, Thermo ESCALAB 250XI equipped with an Al K $\alpha$  X-ray source). The N<sub>2</sub> adsorption-desorption isotherms were obtained using a Micromeritics ASAP

2460 at 77 K. The specific surface area and porosity were calculated by using Brunauer-Emmett-Teller (BET) and Barrett-Joyner-Halenda (BJH) models, respectively. Thermogravimetric analysis (TGA) was performed in air within the temperature range from 25 to 800 °C (TA Instruments Hi-Res TGA 2950).

### **Electrochemical measurements**

The active materials, conductive material (Super P), and binder (polyvinylidene fluoride, PVDF) in a weight ratio of 7:2:1 was dispersed into N-methyl pyrrolidone (NMP) to form a stable slurry. The working electrode was prepared by coating the slurry of onto a round-shaped copper foil (1.1 cm<sup>2</sup>). The density of the active material is about 1.3 mg cm<sup>-2</sup>. The electrochemical performance of the as-fabricated working electrodes was examined using LIR2032 coin-type half cells with 1 M LiPF<sub>6</sub> in a mixture of ethylene carbonate (EC), dimethylcarbonate (DMC) and diethylcarbonate (DEC) (1: 1: 1, v/v/v) as the electrolyte. Lithium foil was used as both the counter electrode and the reference electrode. The electrochemical performance of the working electrodes was tested by using a battery test system (NEWARE CT-3008 W). The potential window for the anode is within the range of 0.01-3.0 V vs. Li/Li<sup>+</sup>, while for the LiMn<sub>2</sub>O<sub>4</sub> cathode is ranging from 3.3 to 4.4 V. Electrochemical impedance spectra (EIS) were collected for the fresh cells at an open potential over the frequency range from 100 kHz to 0.01 Hz on an electrochemical workstation (Shanghai Chen Hua CHI660D). Cyclic voltammetry (CV) was performed on the anodes at various scan rate ranging from 0.1 to 0.8 mV s<sup>-1</sup> within the potential window of 0.01–3.0 V. The charge/discharge measurements at 50 mA g<sup>-1</sup> for the coin-type Fe<sub>2</sub>O<sub>3</sub>-based full cell were performed within the voltage range of 1.4 -3.5 V, while it was carried out within the potential window of 2.0-4.2 V for the Mn<sub>3</sub>O<sub>4</sub>-based full cell.

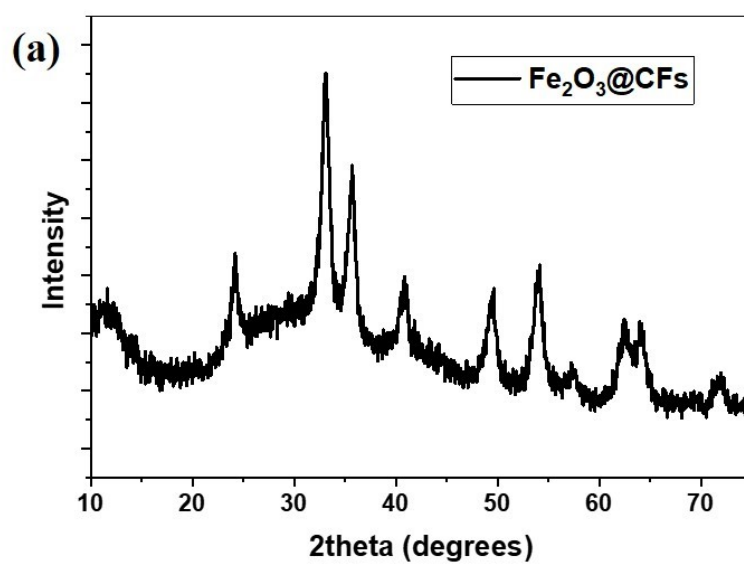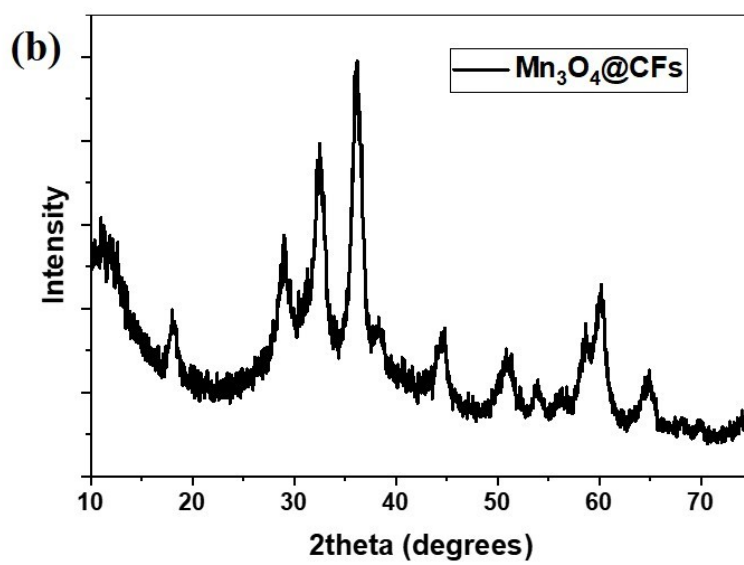

Fig. S1 PXR D patterns of  $\text{M}_x\text{O}_y@\text{CFs}$

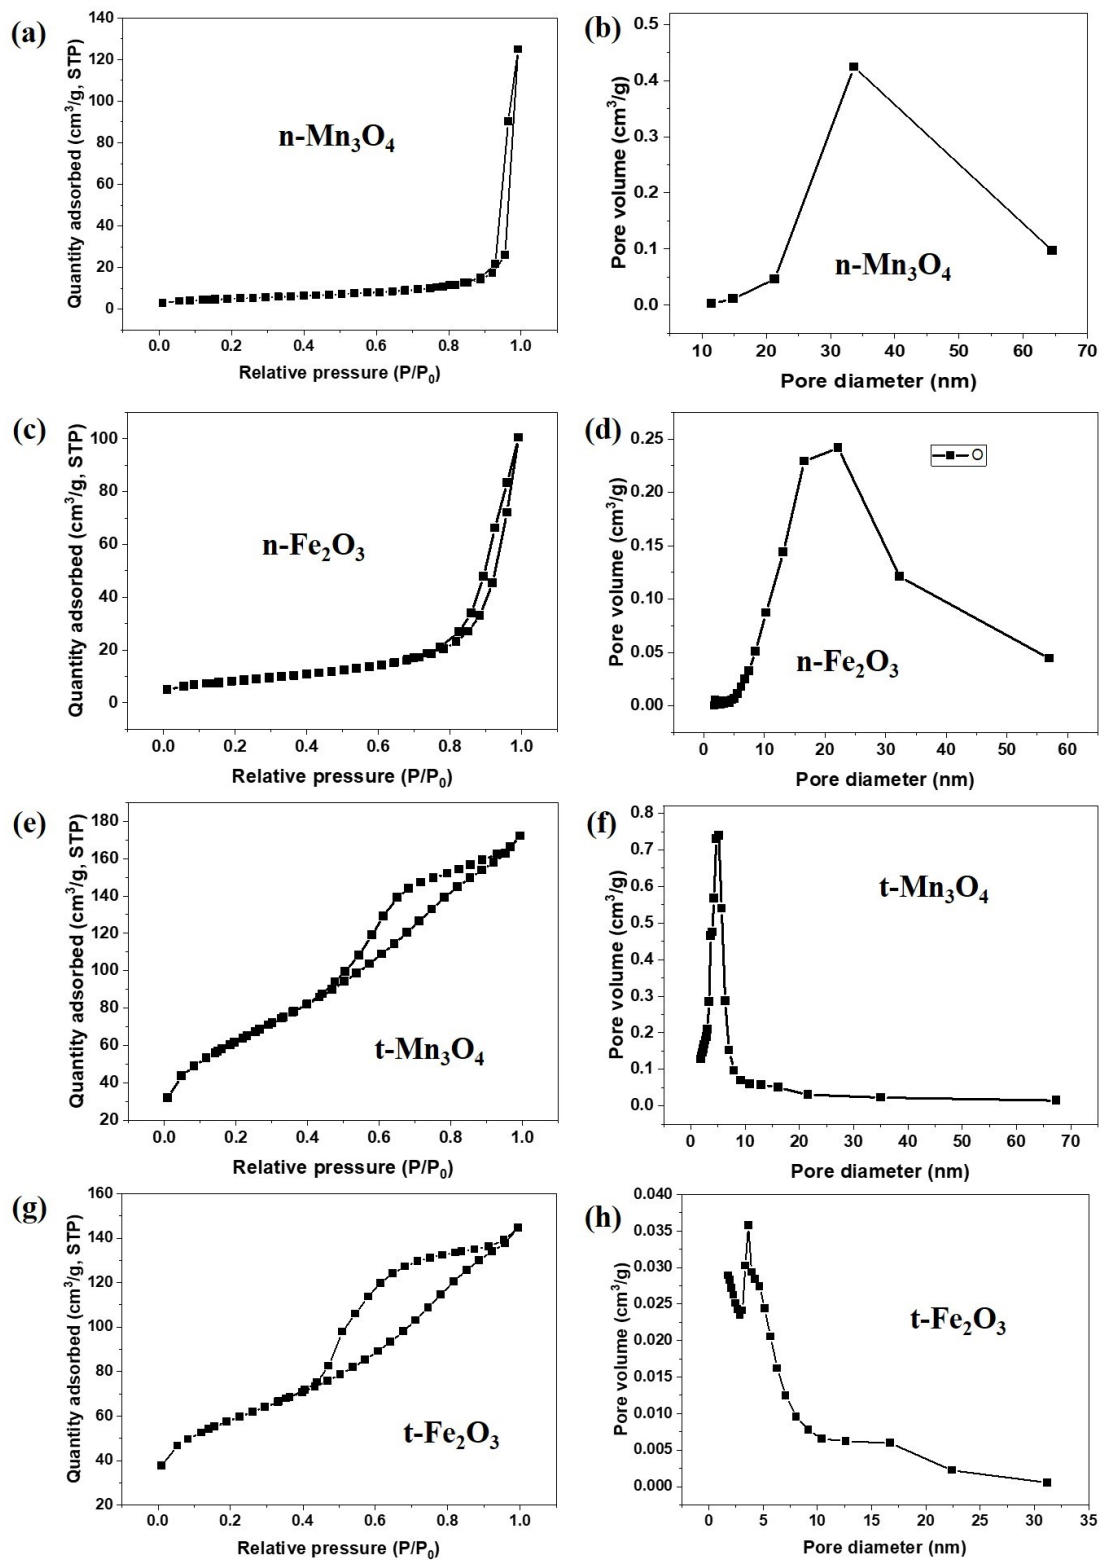

**Fig. S2**  $N_2$  adsorption–desorption isotherms of the materials and the corresponding pore size distributions calculated from the desorption curves by the BJH method.

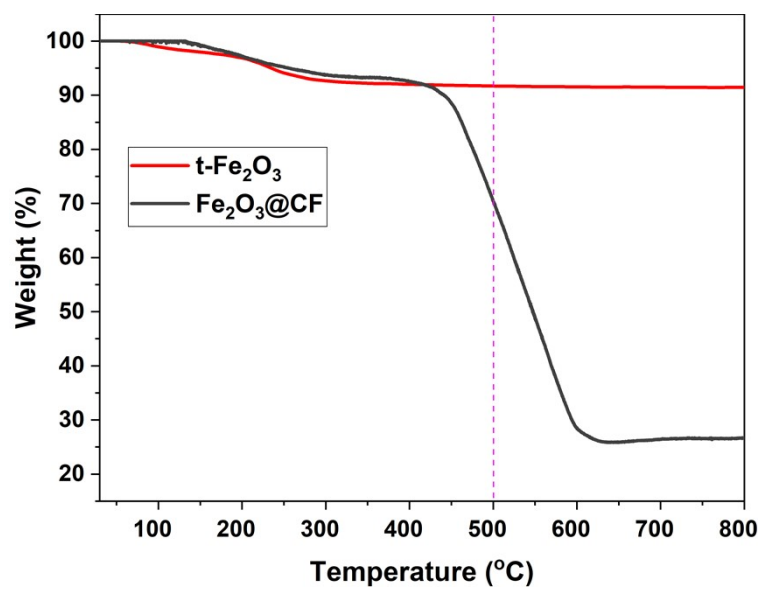

Fig. S3 TGA curves of Fe<sub>2</sub>O<sub>3</sub>-based materials

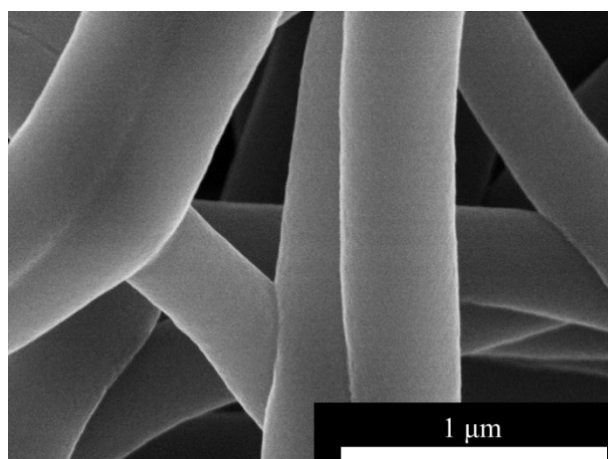

Fig. S4 FE-SEM image of CFs.

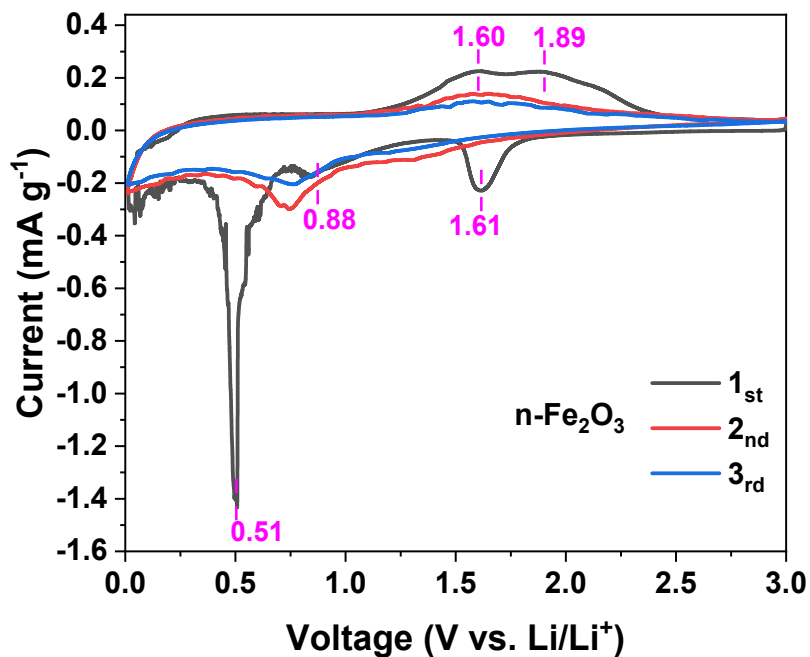

Fig. S5 The first 3 CV cycles of the n-Fe<sub>2</sub>O<sub>3</sub> electrode

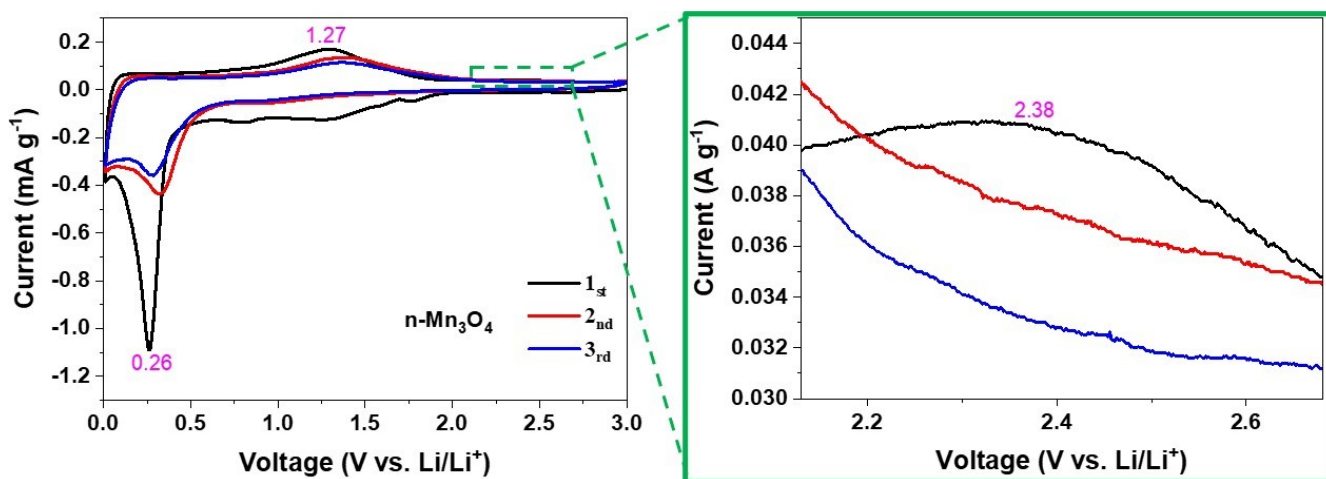

Fig. S6 The first 3 CV cycles of the n-Mn<sub>3</sub>O<sub>4</sub> electrode with the magnification within the voltage range of 2.15-2.65 V.

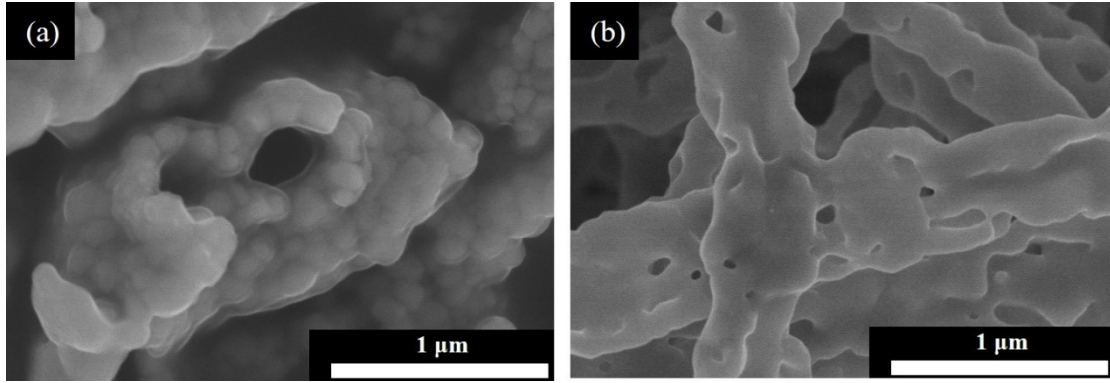

**Fig. S7** FE-SEM images for the cycled t-Fe<sub>2</sub>O<sub>3</sub> (a) and t-Mn<sub>3</sub>O<sub>4</sub> (b) electrodes

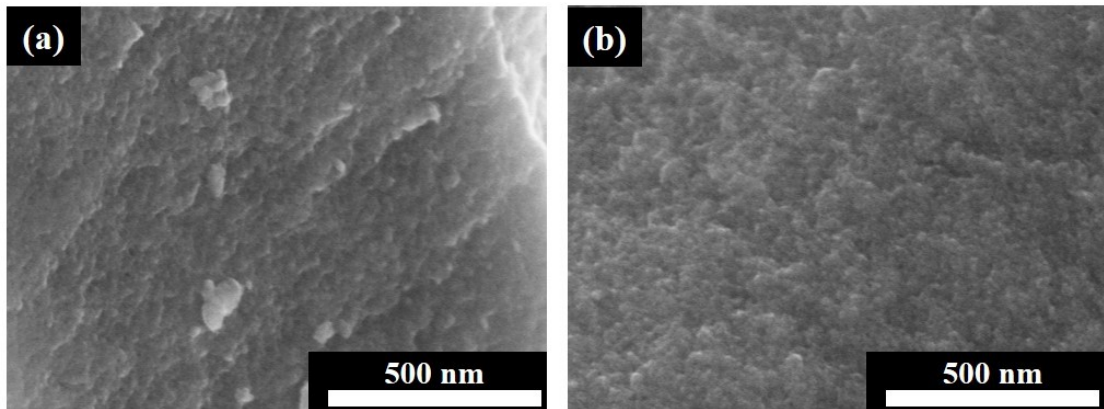

**Fig. S8** FE-SEM images for the cycled n-Fe<sub>2</sub>O<sub>3</sub> (a) and n-Mn<sub>3</sub>O<sub>4</sub> (b) electrodes

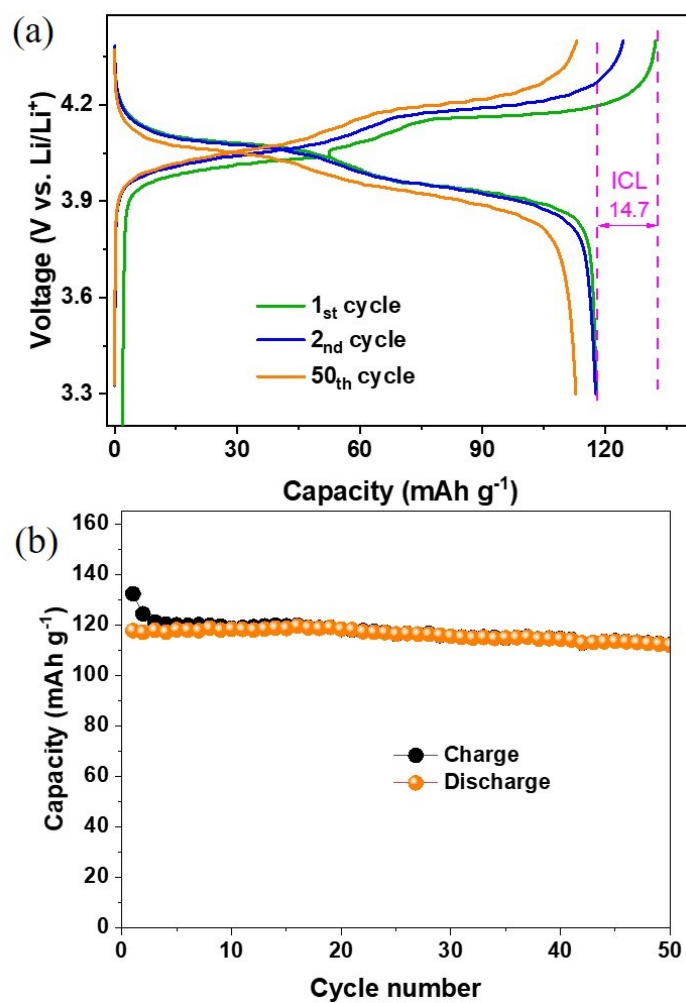

**Fig. S9** Charge/discharge curves at different cycling states within the potential window of 3.3-4.4 V (a) and the cycling stability of the LiMn<sub>2</sub>O<sub>4</sub> cathode (b)



**Table S1** Comparison of electrochemical performance between different materials

| Materials                                                                                                     | Specific capacity (mAh g <sup>-1</sup> )            | Ref.                                         |
|---------------------------------------------------------------------------------------------------------------|-----------------------------------------------------|----------------------------------------------|
| t-Fe <sub>2</sub> O <sub>3</sub>                                                                              | 859.7 at 50 mA g <sup>-1</sup>                      | <b>This work</b>                             |
| t-Mn <sub>3</sub> O <sub>4</sub>                                                                              | 901.4 at 50 mA g <sup>-1</sup>                      |                                              |
| Fe <sub>2</sub> O <sub>3</sub> @Fe <sub>3</sub> O <sub>4</sub> @FeCO <sub>3</sub> /<br>reduced graphene oxide | 868.7 at 200 mA g <sup>-1</sup>                     | Appl surf. Sci.,<br>2022, 605, 154798        |
| MIL-88B(Fe) MOF                                                                                               | 486 at 100 mA g <sup>-1</sup>                       | Electrochim. Acta,<br>2023, 465, 142989      |
| MIL-53(Fe)@RGO                                                                                                | 550 at 100 mA g <sup>-1</sup>                       | Electrochim. Acta,<br>2017, 246, 528–535     |
| rGO/Mn <sub>3</sub> O <sub>4</sub> nanocomp<br>osite                                                          | 795.5 mAh g <sup>-1</sup> at 100 mA g <sup>-1</sup> | Ceram. Int., 2022,<br>21, 31923-31930        |
| Mn-TBI coordination<br>polymer                                                                                | 525 at 50 mA g <sup>-1</sup>                        | Cryst. Growth<br>Des. 2019, 19,<br>6503–6510 |
| MnO@C composites                                                                                              | 1221 at 100 mA g <sup>-1</sup> .                    | Nanoscale, 2015,7,<br>9637-9645              |
| PA-TA COF                                                                                                     | 543 at 1.0 A·g <sup>-1</sup>                        | Nano Res., 2022,<br>15, 9779–9784            |
| DAB-NiPc COF                                                                                                  | 941 at 100 mA g <sup>-1</sup>                       | Chem. Eng. J.<br>2021, 425, 131630           |
